# Supplementary material for: Increased Risk of Long-Term Disabilities Following Childhood Bacterial Meningitis in Sweden
Source: PubMed Central journal article supplement — JAMA Netw Open. 2024 Jan 19;7(1):e2352402. doi: 10.1001/jamanetworkopen.2023.52402 (PMC10799263; doi:10.1001/jamanetworkopen.2023.52402), 2024-01-19
Supplement: jamanetwopen-e2352402-s001.pdf [file jamanetwopen-e2352402-s001.pdf]

## Supplementary Online Content

Mohanty S, Kostenniemi UJ, Silfverdal SA, et al. Increased risk of long-term disabilities following childhood bacterial meningitis in Sweden. *JAMA Netw Open*. 2024;6(1):e2352402.  
doi:10.1001/jamanetworkopen.2023.52402

**eFigure 1.** Flowchart (Sequential Exclusions)

**eFigure 2.** Differences in Risk of Disabilities by Type of Infection

**eFigure 3.** Differences in Risk of Disabilities by Type of Infection (Year of Diagnosis Before 2005)

**eTable 1.** ICD Codes for Preexisting Infections of the Central Nervous System

**eTable 2.** ICD Codes for Disabilities

**eTable 3.** ICD Codes for Preexisting Conditions

**eTable 4.** Medical Procedure Codes for Operations in the Nervous System

**eTable 5.** ICD Codes for Types of Infection

**eTable 6.** Follow-Up Time

**eTable 7.** Unadjusted Cumulative Incidence of Disabilities at 15 and 30 Years of Follow-Up

**eTable 8.** Adjusted Hazard Ratios With No Preexisting Conditions and in Alternative Matched Cohort

**eTable 9.** Participant Characteristics Alternative Matched Cohort

**eTable 10.** Frequency of Infections by Type of Bacterial Pathogen

**eTable 11.** Year of Diagnosis by Type of Bacterial Pathogen

**eTable 12.** P Values for Pairwise Comparison of Adjusted Hazard Ratios by Type of Infection

**eTable 13.** Adjusted Hazard Ratios for Disabilities by Age at Diagnosis

**eTable 14.** Median Follow-Up Time for Cases and Controls by Age at Diagnosis

**eTable 15.** Number of Disabilities

This supplementary material has been provided by the authors to give readers additional information about their work.

**eFigure 1. Flowchart (Sequential Exclusions)**

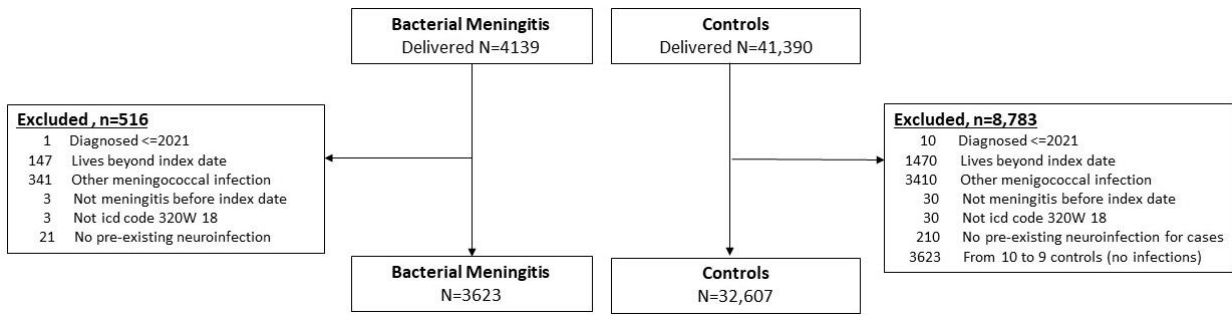

The original cohort delivered to the study team included 4149 cases with bacterial meningitis or meningococcal infection (ICD-9 codes 320 and 036; ICD-10 codes G00 and A39) and 10 matched general population controls. We made the following changes to the cohort:

- Dropped 1 case (and 10 associated controls) diagnosed in 2022 with no follow-up data.
- Dropped 147 cases (and 1470 associated controls) who died on the index date.
- Dropped 341 cases (and 3410 associated controls) with a meningococcal infection other than meningococcal meningitis.
- Dropped 3 cases (and 30 associated controls) who had bacterial meningitis before the index date.
- Dropped 3 cases (and 30 associated controls) with an invalid ICD-9 code “320W 18”.
- Dropped 21 cases (and 210 associated controls) with an infection of the central nervous system prior to the index date.
- Dropped 3623 controls (1 out of 10) including all controls with an infection of the central nervous system prior to the index date.

This gave us a final cohort with 3623 cases and 32,607 general population controls (9 controls per case).

**eFigure 2.** Differences in Risk of Disabilities by Type of Infection

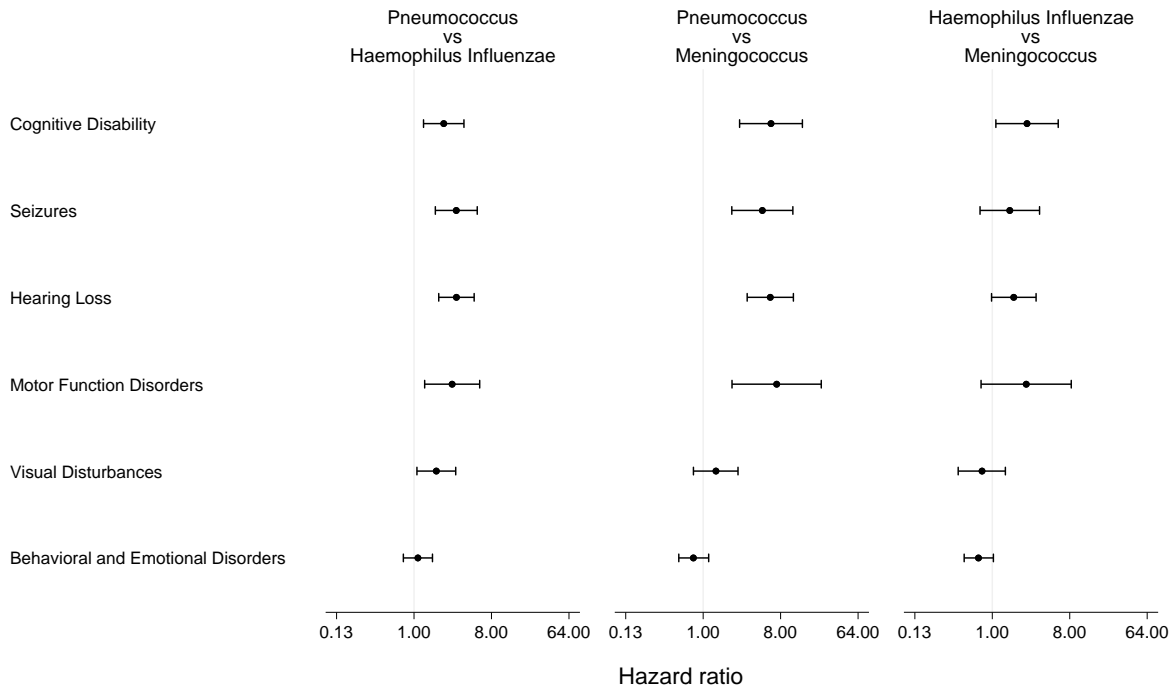

This forest plot shows estimated interaction terms for pairwise differences in the risk of disabilities by bacterial pathogen (an interaction between exposure and type of infection). Reference type of infection is Haemophilus Influenzae (left column) and Meningococcus (middle and right columns). Covariates included in the Cox regression model are age at the index date, the index year, sex, education of mother, education of father, birth characteristics (5-minute Apgar score, birth weight, head circumference), and seven pre-existing conditions (malignancies, perinatal complications, mental and behavioral disorders, diseases of the nervous system, congenital disabilities, traumatic injuries, and operations in the nervous system).

**eFigure 3.** Differences in Risk of Disabilities by Type of Infection (Year of Diagnosis Before 2005)

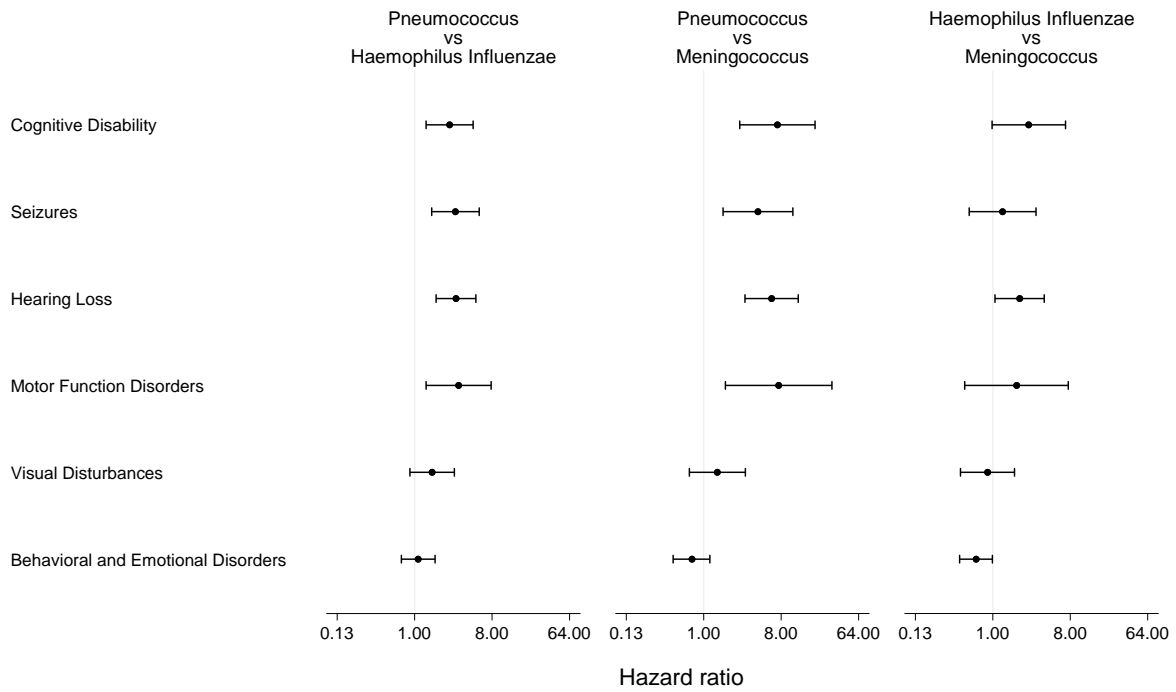

This forest plot shows estimated interaction terms for pairwise differences in the risk of disabilities by bacterial pathogen (an interaction between exposure and type of infection) among cases and controls diagnosed before 2005. Reference type of infection is Haemophilus Influenzae (left column) and Meningococcus (middle and right columns). Covariates included in the Cox regression model are age at the index date, the index year, sex, education of mother, education of father, birth characteristics (5-minute Apgar score, birth weight, head circumference), and seven pre-existing conditions (malignancies, perinatal complications, mental and behavioral disorders, diseases of the nervous system, congenital disabilities, traumatic injuries, and operations in the nervous system).

**eTable 1.** ICD Codes for Preexisting Infections of the Central Nervous System

| <b>Description</b>                          | <b>ICD-10 Codes</b>                      | <b>ICD-9 Codes</b>                       |
|---------------------------------------------|------------------------------------------|------------------------------------------|
| Tuberculosis                                | A15-A19                                  | 010-018                                  |
| Listeriosis                                 | A32                                      | 027                                      |
| Viral Central Nervous System Infections     | A80-A89                                  | 046-049, 061-066, 071, 078.8, 079.9, 323 |
| Herpesviral Infections, Varicella, Zoster   | B00.3, B00.4, B01.0, B01.1, B02.0, B02.1 | 052.0, 052.1, 053.0, 053.1, 054.3, 054.7 |
| HIV                                         | B20-B24                                  | 042-044, 279                             |
| Malaria with Cerebral Complications         | B50                                      | 084                                      |
| Neurocysticercosis                          | B69.0                                    | 123.1                                    |
| Late Complications due to Severe Infections | B90-B94                                  | 137-139                                  |

**eTable 2.** ICD Codes for Disabilities

| <b>Disability</b>                  | <b>Description</b>                                                                                                                                                                                                                              | <b>ICD-10 Codes</b>                                                      | <b>ICD-9 Codes</b>                                                      |
|------------------------------------|-------------------------------------------------------------------------------------------------------------------------------------------------------------------------------------------------------------------------------------------------|--------------------------------------------------------------------------|-------------------------------------------------------------------------|
| Cognitive Disabilities             | Mild cognitive disorder, intellectual disabilities, disorders of speech and language, disorders of scholastic skills                                                                                                                            | F06.7, F70-F79, F80.0, F81.0, F81.2, F81.8, F81.9                        | 315.A, 315.B, 315.D, 315.W, 315.X, 317-319                              |
| Seizures                           | Epilepsy and recurrent seizures                                                                                                                                                                                                                 | G40                                                                      | 345                                                                     |
| Hearing Loss                       | Conductive and sensorineural hearing loss, adjustment of implanted device for special senses, presence of otological and audiological implants, presence of external hearing aid                                                                | H90.3-H90.5, H90.7                                                       | 389.B-389.C                                                             |
| Motor Function Disorders           | Disorders of motor function, dystonia, other extrapyramidal and movement disorders, cerebral palsy, abnormalities of gait and mobility, ataxia, dependent on wheelchair                                                                         | F82, G24.9, G25.3, G25.5, G25.9, G80, G81.1, G82.1, G83.0-G83.3, R26-R27 | 315.E, 333.C, 333.F, 333.W, 333.X, 342.B, 343, 344.A-344.F, 781.C-781.D |
| Visual Disturbances                | Disorders of optic nerve and visual pathways, disorders of ocular muscles, binocular movement, accommodation and refraction, visual disturbances and blindness, adjustment of implanted device for special senses, presence of intraocular lens | H47, H49-H51, H53.0, H53.2, H53.4, H54.4-H54.7                           | 368.A, 368.C, 368.E, 369.G-369.H, 369.W, 377-378                        |
| Behavioral and Emotional Disorders | Behavioral and emotional disorders with onset in childhood and adolescence                                                                                                                                                                      | F90-F98                                                                  | 307, 309, 312-314                                                       |
| Intracranial Structural Injuries   | Hydrocephalus, mechanical complications of ventricular intracranial shunt                                                                                                                                                                       | G91.1-G91.2, T85.0                                                       | 331.E, 996.C                                                            |

**eTable 3.** ICD Codes for Preexisting Conditions

| Pre-existing Condition          | Description                           | ICD-10 Codes                                 | ICD-9 Codes      |
|---------------------------------|---------------------------------------|----------------------------------------------|------------------|
| Malignancies and Tumors         | Malignant tumors                      | C00-C97                                      | 140-208          |
|                                 | Benign tumors central nervous system  | D32-D33                                      | 225              |
|                                 | Unknown tumors central nervous system | D42-D43                                      | 237, 239.6-239.7 |
| Perinatal Complications         |                                       | P00-P96                                      | 760-779          |
| Mental and Behavioral Disorders |                                       | F00-F99                                      | 290-319          |
| Diseases of the Nervous System  |                                       | G00-G99                                      | 320-389          |
| Congenital Disabilities         |                                       | Q00-Q99                                      | 740-759          |
| Traumatic Injuries              | Cranial nerves                        | S04, T90.3                                   | 907, 950-951     |
|                                 | Intracranial injuries                 | S06, T90.5                                   | 850-854, 907     |
|                                 | Spinal cord injuries                  | S14.0-S14.1, S24.0-S24.1, S34.0-S34.1, T91.3 | 907, 952         |

**eTable 4.** Medical Procedure Codes for Operations in the Nervous System

| Medical Procedure                | Classification of Care (KVÅ) | Classification of Care (KOP) |
|----------------------------------|------------------------------|------------------------------|
| Operations in the Nervous System | AA-AW                        | 0100-0699                    |

**eTable 5.** ICD Codes for Types of Infection

| <b>Bacterial Pathogen</b>         | <b>ICD-9</b> | <b>ICD-10</b>                 |
|-----------------------------------|--------------|-------------------------------|
| Haemophilus Meningitis            | 320A         | G00.0                         |
| Pneumococcal Meningitis           | 320B         | G00.1                         |
| Meningococcal Meningitis          | 036A         | A390                          |
| Streptococcal Meningitis          | 320C         | G00.2                         |
| Staphylococcal Meningitis         | 320D         | G00.3                         |
| Other Bacterial Meningitis        | 320H, 320W   | G00.8, G00.8A, G00.8B, G00.8W |
| Bacterial Meningitis, Unspecified | 320, 320X    | G00.9                         |



**eTable 6.** Follow-Up Time

| <b>Disability</b>                  | <b>Bacterial Meningitis</b><br>Median (p25-p75) years | <b>Controls</b><br>Median (p25-p75) years |
|------------------------------------|-------------------------------------------------------|-------------------------------------------|
|                                    |                                                       |                                           |
| Cognitive Disability               | 23.8 (11.7-30.5)                                      | 24.5 (13.2-30.6)                          |
| Seizures                           | 23.8 (11.2-30.5)                                      | 24.5 (13.2-30.6)                          |
| Hearing Loss                       | 23.1 (10.9-30.3)                                      | 24.5 (13.3-30.6)                          |
| Motor Function Disorders           | 24.1 (11.3-30.6)                                      | 24.6 (13.3-30.6)                          |
| Visual Disturbances                | 23.8 (11.0-30.5)                                      | 24.4 (13.0-30.6)                          |
| Behavioral and Emotional Disorders | 23.3 (11.1-30.4)                                      | 23.8 (12.4-30.4)                          |
| Intracranial Structural Injuries   | 24.3 (12.1-30.6)                                      | 24.7 (13.4-30.7)                          |

**eTable 7.** Unadjusted Cumulative Incidence of Disabilities at 15 and 30 Years of Follow-Up

| Disability                         | Bacterial Meningitis | Controls | Bacterial Meningitis | Controls |
|------------------------------------|----------------------|----------|----------------------|----------|
|                                    | 15 years             | 15 years | 30 years             | 30 years |
| <u>Full Cohort</u>                 |                      |          |                      |          |
| Cognitive Disability               | 5.91                 | 1.14     | 8.01                 | 1.99     |
| Seizures                           | 6.59                 | 0.90     | 8.00                 | 1.62     |
| Hearing Loss                       | 7.43                 | 0.76     | 10.0                 | 1.40     |
| Motor Function Disorders           | 5.84                 | 0.69     | 6.42                 | 0.95     |
| Visual Disturbances                | 7.68                 | 2.00     | 9.12                 | 3.15     |
| Behavioral and Emotional disorders | 8.21                 | 5.05     | 13.7                 | 9.61     |
| Intracranial Structural Injuries   | 3.33                 | 0.06     | 3.66                 | 0.08     |
| <u>No Pre-existing Conditions</u>  |                      |          |                      |          |
| Cognitive Disability               | 3.68                 | 0.80     | 5.21                 | 1.55     |
| Seizures                           | 4.18                 | 0.67     | 5.53                 | 1.32     |
| Hearing Loss                       | 6.56                 | 0.62     | 9.03                 | 1.22     |
| Motor Function Disorders           | 3.41                 | 0.49     | 3.70                 | 0.69     |
| Visual Disturbances                | 4.79                 | 1.66     | 5.76                 | 2.75     |
| Behavioral and Emotional disorders | 6.82                 | 4.39     | 12.1                 | 8.94     |
| Intracranial Structural Injuries   | 1.42                 | 0.02     | 1.54                 | 0.03     |

**eTable 8.** Adjusted Hazard Ratios With No Preexisting Conditions and in Alternative Matched Cohort

| <b>Disability</b>                  | <b>Matched Cohort<sup>a</sup></b><br>HR (95% CI) | <b>No Pre-existing Conditions<sup>a</sup></b><br>HR (95% CI) | <b>Alternative Matched Cohort<sup>a</sup></b><br>HR (95% CI) |
|------------------------------------|--------------------------------------------------|--------------------------------------------------------------|--------------------------------------------------------------|
|                                    | (# cases = 3623)                                 | (# cases = 2711)                                             | (# cases = 3228)                                             |
| Cognitive Disability               | 3.23 (2.71-3.85)                                 | 3.63 (2.94-4.49)                                             | 4.24 (2.96-6.09)                                             |
| Seizures                           | 4.14 (3.46-4.96)                                 | 4.76 (3.85-5.87)                                             | 4.69 (3.29-6.70)                                             |
| Hearing Loss                       | 7.90 (6.68-9.33)                                 | 8.82 (7.32-10.6)                                             | 9.00 (6.16-13.1)                                             |
| Motor Function Disorders           | 4.65 (3.72-5.80)                                 | 5.68 (4.37-7.38)                                             | 7.04 (4.28-11.6)                                             |
| Visual Disturbances                | 2.37 (2.04-2.74)                                 | 2.33 (1.94-2.81)                                             | 2.90 (2.18-3.85)                                             |
| Behavioral and Emotional Disorders | 1.42 (1.26-1.59)                                 | 1.45 (1.27-1.65)                                             | 1.41 (1.18-1.67)                                             |
| Intracranial Structural Injuries   | 26.0 (15.5-43.7)                                 | 50.1 (21.4-117)                                              | 17.4 (5.30-57.1)                                             |

<sup>a</sup> This table shows the estimated adjusted hazard ratios for seven disabilities. The left column displays the results in the matched cohort, the middle column removes cases and controls with any pre-existing condition (see eTable3 and eTable4 for codes), and the right column shows results for the alternative matched cohort. Covariates included in the Cox regression model are age at the index date, the index year, sex, education of mother, education of father, birth characteristics (5-minute Apgar score, birth weight, head circumference), and seven pre-existing conditions (malignancies, perinatal complications, mental and behavioral disorders, diseases of the nervous system, congenital disabilities, traumatic injuries, and operations in the nervous system).

**eTable 9.** Participant Characteristics Alternative Matched Cohort

| Characteristic                                         | Bacterial Meningitis<br>(n=3228)<br>Cases, No., % | Controls<br>(n=3228)<br>Controls, No., % |
|--------------------------------------------------------|---------------------------------------------------|------------------------------------------|
| Female                                                 | 1444 (44.7)                                       | 1445 (44.8)                              |
| <b><u>Age at Diagnosis of Bacterial Meningitis</u></b> |                                                   |                                          |
| Age (years), Mean (SD)                                 | 3.9 (5.0)                                         | 4.1 (5.1)                                |
| Age (years), Median (p25-p75)                          | 1.4 (0.4-5.6)                                     | 1.5 (0.5-5.9)                            |
| Age 0 Years                                            | 1308 (40.5)                                       | 1220 (37.8)                              |
| Age 1 Years                                            | 561 (17.4)                                        | 586 (18.2)                               |
| Age 2-4 Years                                          | 494 (15.3)                                        | 530 (16.4)                               |
| Age 5-17 Years                                         | 865 (26.8)                                        | 892 (27.6)                               |
| <b><u>Education of Mother</u></b>                      |                                                   |                                          |
| Primary School                                         | 373 (11.6)                                        | 360 (11.2)                               |
| High School                                            | 1469 (45.5)                                       | 1494 (46.3)                              |
| University                                             | 1367 (42.3)                                       | 1355 (42.0)                              |
| Education Missing                                      | 19 (0.6)                                          | 19 (0.6)                                 |
| <b><u>Education of Father</u></b>                      |                                                   |                                          |
| Primary School                                         | 548 (17.0)                                        | 566 (17.5)                               |
| High School                                            | 1572 (48.7)                                       | 1585 (49.1)                              |
| University                                             | 1056 (32.7)                                       | 1015 (31.4)                              |
| Education Missing                                      | 52 (1.6)                                          | 62 (1.9)                                 |
| <b><u>Birth Characteristics</u></b>                    |                                                   |                                          |
| Apgar 5 Min, Mean (SD)                                 | 9.7 (0.8)                                         | 9.7 (0.9)                                |
| Birth Weight (g), Mean (SD)                            | 3485 (636)                                        | 3496 (609)                               |
| Head Circumference (cm), Mean (SD)                     | 34.6 (1.9)                                        | 34.7 (1.7)                               |
| <b><u>Pre-existing Conditions</u></b>                  |                                                   |                                          |
| Malignancies                                           | 1 (0.0)                                           | 1 (0.0)                                  |
| Perinatal Complications                                | 264 (8.2)                                         | 264 (8.2)                                |
| Mental and Behavioral Disorders                        | 21 (0.7)                                          | 21 (0.7)                                 |
| Diseases of the Nervous System                         | 104 (3.2)                                         | 104 (3.2)                                |
| Congenital Disabilities                                | 106 (3.3)                                         | 106 (3.3)                                |
| Traumatic Injuries                                     | 31 (1.0)                                          | 31 (1.0)                                 |
| Operation in Nervous System                            | 153 (4.7)                                         | 153 (4.7)                                |

**eTable 10.** Frequency of Infections by Type of Bacterial Pathogen

| <b>Bacterial Pathogen</b>         | <b>Frequency</b> | <b>Percent (%)</b> |
|-----------------------------------|------------------|--------------------|
| Haemophilus Meningitis            | 888              | 24.5               |
| Pneumococcal Meningitis           | 571              | 15.8               |
| Meningococcal Meningitis          | 497              | 13.7               |
| Streptococcal Meningitis          | 317              | 8.7                |
| Staphylococcal Meningitis         | 106              | 2.9                |
| Other bacterial Meningitis        | 448              | 12.4               |
| Bacterial Meningitis, Unspecified | 796              | 22.0               |
| Total                             | 3623             | 100.0              |

**eTable 11.** Year of Diagnosis by Type of Bacterial Pathogen

| <b>Bacterial Pathogen</b>         | <b>Median</b> | <b>IQR (p25-p75)</b> | <b>Min</b> | <b>Max</b> |
|-----------------------------------|---------------|----------------------|------------|------------|
| Haemophilus Meningitis            | 1990          | 1988-1992            | 1987       | 2021       |
| Pneumococcal Meningitis           | 2000          | 1993-2007            | 1987       | 2021       |
| Meningococcal Meningitis          | 1997          | 1991-2005            | 1987       | 2021       |
| Streptococcal Meningitis          | 2007          | 1997-2014            | 1987       | 2021       |
| Staphylococcal Meningitis         | 2004.5        | 1994-2014            | 1987       | 2020       |
| Other bacterial Meningitis        | 1996          | 1992-2011            | 1987       | 2021       |
| Bacterial Meningitis, Unspecified | 2000          | 1993-2009            | 1987       | 2021       |

**eTable 12.** P Values for Pairwise Comparison of Adjusted Hazard Ratios by Type of Infection

| <b>Disability</b>                  | <b>Pneumococcus<br/>vs<br/>Haemophilus Influenzae<sup>a</sup></b> | <b>Pneumococcus<br/>vs<br/>Meningococcus<sup>a</sup></b> | <b>Haemophilus Influenzae<br/>vs<br/>Meningococcus<sup>a</sup></b> |
|------------------------------------|-------------------------------------------------------------------|----------------------------------------------------------|--------------------------------------------------------------------|
| Cognitive Disability               | 0.004                                                             | <.001                                                    | 0.03                                                               |
| Seizures                           | <.001                                                             | <.001                                                    | 0.25                                                               |
| Hearing Loss                       | <.001                                                             | <.001                                                    | 0.06                                                               |
| Motor Function Disorders           | 0.007                                                             | 0.001                                                    | 0.14                                                               |
| Visual Disturbances                | 0.02                                                              | 0.26                                                     | 0.39                                                               |
| Behavioral and Emotional Disorders | 0.60                                                              | 0.22                                                     | 0.07                                                               |

<sup>a</sup> This table shows p-values for interaction terms between bacterial meningitis and type of infection in estimated Cox regression model used to test for pairwise differences in the relative risk of disabilities between types of infections. Covariates included in the Cox regression model are age at the index date, the index year, sex, education of mother, education of father, birth characteristics (5-minute Apgar score, birth weight, head circumference), and seven pre-existing conditions (malignancies, perinatal complications, mental and behavioral disorders, diseases of the nervous system, congenital disabilities, traumatic injuries, and operations in the nervous system).

**eTable 13.** Adjusted Hazard Ratios for Disabilities by Age at Diagnosis

| <b>Disability</b>                  | <b>Age Below Median<sup>a</sup></b><br>HR (95% CI) | <b>Age Above Median<sup>a</sup></b><br>HR (95% CI) | <b>P-value (Difference = 0)</b> |
|------------------------------------|----------------------------------------------------|----------------------------------------------------|---------------------------------|
| Cognitive Disability               | 4.67 (3.77-5.78)                                   | 1.73 (1.29-2.32)                                   | <.001                           |
| Seizures                           | 5.43 (4.32-6.83)                                   | 2.87 (2.15-3.83)                                   | 0.004                           |
| Hearing Loss                       | 8.42 (6.68-10.6)                                   | 7.39 (5.77-9.45)                                   | 0.29                            |
| Motor Function Disorders           | 5.91 (4.58-7.63)                                   | 2.88 (1.90-4.36)                                   | 0.06                            |
| Visual Disturbances                | 2.37 (1.97-2.85)                                   | 2.28 (1.78-2.92)                                   | 0.81                            |
| Behavioral and Emotional Disorders | 1.67 (1.45-1.93)                                   | 1.11 (0.91-1.35)                                   | 0.002                           |
| Intracranial Structural Injuries   | 54.8 (25.0-120)                                    | 9.79 (4.53-21.2)                                   | 0.003                           |

<sup>a</sup> This table shows the estimated adjusted hazard ratios for seven disabilities by age at diagnosis (above or below median age conditional on cause of bacterial meningitis [ICD codes in eTable 5]), adjusting for age at the index date, the index year, sex, education of mother, education of father, birth characteristics (5-minute Apgar score, birth weight, head circumference), and seven pre-existing conditions (malignancies, perinatal complications, mental and behavioral disorders, diseases of the nervous system, congenital disabilities, traumatic injuries, and operations in the nervous system). The right column displays p-values for an interaction term between bacterial meningitis and age at diagnosis used to test for differences between children diagnosed when young or old (a difference between the estimated coefficients in the two columns labelled age below median and age above median).



**eTable 14.** Median Follow-Up Time for Cases and Controls by Age at Diagnosis

| <b>Disability</b>                  | <b>Age Below Median</b><br>Years | <b>Age Above Median</b><br>Years |
|------------------------------------|----------------------------------|----------------------------------|
|                                    |                                  |                                  |
| Cognitive Disability               | 23.6                             | 24.9                             |
| Seizures                           | 23.7                             | 24.9                             |
| Hearing Loss                       | 23.7                             | 24.9                             |
| Motor Function Disorders           | 23.8                             | 25.0                             |
| Visual Disturbances                | 23.5                             | 24.9                             |
| Behavioral and Emotional Disorders | 22.8                             | 24.5                             |
| Intracranial Structural Injuries   | 24.0                             | 25.0                             |

**eTable 15.** Number of Disabilities

| <b>Number of Disabilities</b> | <b>Bacterial Meningitis<br/>(n=3623)<br/>No., %</b> | <b>Controls<br/>(n=32,607)<br/>No., %</b> |
|-------------------------------|-----------------------------------------------------|-------------------------------------------|
| Mean (SD)                     | 0.49 (0.96)                                         | 0.14 (0.42)                               |
| 0 disabilities                | 2571 (71.0)                                         | 28,672 (87.9)                             |
| 1 disability                  | 654 (18.1)                                          | 3379 (10.4)                               |
| 2 disabilities                | 207 (5.7)                                           | 446 (1.4)                                 |
| 3 disabilities                | 100 (2.8)                                           | 88 (0.3)                                  |
| 4 disabilities                | 59 (1.6)                                            | 17 (0.1)                                  |
| 5 disabilities                | 26 (0.7)                                            | 5 (0.0)                                   |
| 6 disabilities                | 4 (0.1)                                             | 0 (0.0)                                   |
| 7 disabilities                | 2 (0.1)                                             | 0 (0.0)                                   |
