# Supplementary material for: Increased Risk of Long-Term Disabilities Following Childhood Bacterial Meningitis in Sweden
Source: PubMed Central journal article supplement — JAMA Netw Open. 2024 Jan 19;7(1):e2352402. doi: 10.1001/jamanetworkopen.2023.52402 (PMC10799263; doi:10.1001/jamanetworkopen.2023.52402), 2024-01-19
Supplement: jamanetwopen-e2352402-s002.pdf [file jamanetwopen-e2352402-s002.pdf]

## Data Sharing Statement

Mohanty. Increased Risk of Long-Term Disabilities Following Childhood Bacterial Meningitis in Sweden. *JAMA Netw Open*. Published January 19, 2024.

doi:10.1001/jamanetworkopen.2023.52402

### Data

**Data available:** No

### Additional Information

**Explanation for why data not available:** The data used for the study is Swedish register data provided by the National Board of Health and Welfare. The data has been obtained through an individual agreement between the researchers and the Board of Health and Welfare (the researchers cannot share the data with others). Those who wish to replicate the results in the study can apply for data from the National Board of Health and Welfare (all the data used in the study is available for research in nationwide medical registers)
